# Supplementary material for: Risk assessment for colorectal cancer via polygenic risk score and lifestyle exposure: a large-scale association study of East Asian and European populations
Source: Genome Med. 2023 Jan 24;15:4. doi: 10.1186/s13073-023-01156-9 (PMC9875451; doi:10.1186/s13073-023-01156-9)
Supplement: Supplementary file 1 — Additional file 1: Table S1. Basic characteristics of colorectal cancer GWASs. Table S2. Basic characteristics of the UK Biobank cohort. Table S3. Summary of 37 colorectal cancer GWAS-reported SNPs in East Asian. Table S4. Summary of eight lifestyle factors in the UK Biobank cohort. Table S5. Summary of one novel EAS-EUR conditionally independent variant at known colorectal cancer risk loci. Table S6. Functional annotations of one novel colorectal cancer risk locus. Table S7. The association of PRS with colorectal cancer risk in the UK Biobank. Table S8. Sensitivity analyses for the association of PRS with colorectal cancer risk in the UK Biobank cohort. Table S9. The association of lifestyle score with colorectal cancer risk in the UK Biobank cohort. Table S10. Sensitivity analyses for the association of lifestyle score with colorectal cancer risk in the UK Biobank cohort. Table S11. Sensitivity analyses for cumulative risk of developing colorectal cancer according to different levels of PRS and lifestyle score in the UK Biobank cohort. Fig. S1. Principal component analysis based on the colorectal cancer GWAS subjects and 1000 Genomes Project populations. Fig. S2. Quantile-quantile plot and genomic inflation factor for the association with colorectal cancer risk in the meta-analysis of EAS-EUR GWASs. Fig. S3. Manhattan plot from colorectal cancer EAS-EUR GWAS meta-analysis. Fig. S4. The association of PRSCSx with incident colorectal cancer in the JSCRC GWAS dataset. Fig. S5. The association of PRSCSx with incident colorectal cancer in the CORSA GWAS dataset. Fig. S6. The association of PRS with incident colorectal cancer in the UK Biobank cohort. Fig. S7. The association of PRS with lifestyle factors in the UK Biobank cohort. Fig. S8. Distribution of 5-year absolute risk of developing colorectal cancer in the UK Biobank cohort. [file 13073_2023_1156_MOESM1_ESM.pdf]

## **Supplementary Materials**

### **Study subjects**

#### ***Case-control studies***

#### **East Asian (EAS) of Chinese population**

##### ***NJCRC GWAS***

The colorectal cancer cases were recruited from the Cancer Center of Nanjing Medical University, and the cancer-free controls were from the same districts of Nanjing. The population details of the NJCRC GWAS have been described in previous studies [1, 2].

##### ***BJCRC GWAS***

All participants were recruited from Beijing, colorectal cancer cases were recruited from local hospitals and had pathologically proven disease. Cancer-free control subjects were recruited in local hospitals for individuals receiving routine physical examinations or in the communities for those participating screening of non-communicable diseases. The population details have been described in previous study [3].

##### ***SHCRC GWAS***

The colorectal cancer cases were recruited from the Fudan University Shanghai Cancer Center (FUSCC), and the cancer-free controls were from the same districts of Shanghai. The population details about the cases included in SHCRC GWAS have been described in previous study [4].

##### ***ZJCRC GWAS***

The individuals of ZJCRC GWAS cases were derived from the Jiashan Institute of Cancer Prevention and Treatment, and the Second Affiliated Hospital of Zhejiang University School of Medicine. The cancer-free controls were selected from individuals receiving routine physical examination at hospitals or those participating in community screening for non-communicable diseases in Zhejiang province.

#### *JSCRC GWAS*

The confirmed cases were consecutively recruited from hospitals in Jiangsu province, China. The cancer-free control subjects were selected from individuals receiving routine physical examination at hospitals or those participating in community screening for non-communicable diseases in Jiangsu province.

For all Chinese GWASs, we used a uniform individual quality control protocol to filter the samples as follows: (i) call rate < 95%; (ii) gender discrepancies; (iii) unexpected duplicates or probable relatives based on pairwise identity by descent ( $PI\_HAT > 0.25$ ); and (iv) population stratification outliers based on EIGENSTRAT.

#### **EAS of Japanese population**

All case samples of the Japanese GWAS were collected in the BioBank Japan Project (BBJ), which is a biobank that recruited approximately 200,000 patients with a diagnosis of at least one of 47 diseases in Japan. The healthy controls were from several population-based prospective cohorts and participants without related diagnoses in the BBJ.

#### **European (EUR) population**

*Genetics and Epidemiology of Colorectal Cancer Consortium (GECCO)*

We collected GWAS datasets of GECCO consortia from the database of Genotypes and Phenotypes (dbGaP, phs001315.v1.p1; phs001415.v1.p1 and phs001078.v1.p1). After individual-level quality control: (i) unexpected duplicates or probable relatives based on pairwise identity by descent ( $PI\_HAT > 0.25$ ); (ii) restricted to individuals of EUR ancestry; and (iii) excluded participants recruited from Prostate, Lung, Colorectal and Ovarian (PLCO) cancer screening trial and Colorectal Cancer Study of Austria (CORSa) dataset, a total of 21,608 cases and 20,278 cancer-free controls were retained for analysis.

#### *PLCO*

The PLCO cancer screening trial is a population-based cohort study that aims to evaluate the accuracy and reliability of screening methods for prostate, lung, colorectal and ovarian cancer, among which 154,897 individuals aged 55–74 years were randomly recruited from 10 United States research centers from 1993 to 2001.

#### *CORSa*

In the CORSa study, more than 13,000 Caucasian participants have been recruited within the province-wide screening project "Burgenland Prevention Trial of Colorectal Disease with Immunological Testing" (B-PREDICT) since 2003. All inhabitants of the Austrian province Burgenland aged between 40 and 80 years are annually invited to participate in fecal immunochemical testing and haemoccult positive screening participants are invited for colonoscopy. CORSa participants were recruited from the four KRAGES hospitals in Burgenland, Austria, and additionally, at the Medical University of Vienna (Department of Surgery), the Viennese hospitals

"Rudolfstiftung" and the "Sozialmedizinisches Zentrum Sud", and at the Medical University of Graz (Department of Internal Medicine). We accessed the CORSA genotype data from dbGaP (phs001415.v1.p1); after individual-level quality control: (i) unexpected duplicates or probable relatives based on pairwise identity by descent ( $PI\_HAT > 0.25$ ); and (ii) restricted to individuals of EUR ancestry, a total of 1,289 cases and 1,284 controls were retained for analysis.

### ***Longitudinal cohort of UK Biobank***

The UK Biobank cohort is a prospective, population-based study, which recruited 502,528 adults aged 40-69 years from the general population between April 2006 and December 2010. Participants visited one of 22 assessment centers across England, Scotland and Wales, where they completed touchscreen and nurse-led questionnaires, and provided biological samples.

After individual-level quality control: (i) removed individuals with prevalent cancer [except non-melanoma skin cancer, based on the International Classification of Diseases, 10th revision (ICD-10, C44)] at baseline; (ii) sex discordance; (iii) outliers for genotype missingness or excess heterozygosity; (iv) retained unrelated participants; (v) restricted to "white British" participants individuals of EUR ancestry and (vi) removed individuals who decided not to participate in this program, a total of 355,543 participants were retained for analysis.

### **Genotyping and imputation**

#### ***Case-control GWAS study***

## **EAS of Chinese population**

Genomic DNA was derived from EDTA-venous blood by using the Qiagen Blood Kit (Qiagen). Genotyping was conducted using Illumina Human Omni ZhongHua Bead Chips for NJCRC GWAS, Illumina Infinium Global Screening Assay (GSA) for SHCRC GWAS, Affymetrix Axiom Genome-Wide CHB1 and CHB2 Arrays for BJCRC GWAS, and Illumina Asian Screening Array (ASA) for JSCRC and ZJCRC GWASs. Furthermore, we imputed the non-genotyped SNPs based on the 1000 Genomes Project (Phase 1 or Phase 3) using IMPUTE2. GTOOL was used to convert imputed data into PLINK format with a threshold of 0.9.

## **EAS of Japanese population**

The samples were genotyped with the Illumina HumanOmniExpressExome BeadChip or a combination of the Illumina HumanOmniExpress and HumanExome BeadChips. The genotyping data were then imputed using SHAPEIT2 and minimac3 based on the reference panels of the 1000 Genomes Project (Phase 3). More details have been reported previously [5].

## **EUR population**

### *GECCO and CORSA*

Genomic DNA extracted from the blood samples was genotyped using Infinium OncoArray-500K array (dbGaP accession: phs001415.v1.p1), Illumina HumanOmniExpressExome-8v1–2 array (dbGaP accession: phs001315.v1.p1), and Illumina HumanCytoSNP-12v2 or HumanOmniExpress (dbGaP accession: phs001078.v1.p1). More details can be found in previous studies [6, 7]. Imputations

of dbGap studies were performed using the 1000 Genomes Project (Phase 1) or Haplotype Reference Consortium (HRC) reference panel.

### *PLCO*

Sequential blood samples were collected from participants assigned to the screening arm. Ninety-three percent of participants assigned to the screening arm provided a baseline blood sample. In the observational (control) arm, buccal cells were collected via mail using the “swish-and-spit” protocol, and the participation rate was 65%. The detailed information can be found in our previous study [8]. A more detailed description of the PLCO study is available online (<http://dcp.cancer.gov/plco>). We obtained the GWAS summary statistics from the PLCOjs website (<https://exploregwas.cancer.gov/plco-atlas>; dbGaP accession: phs001286.v2.p2), of which the non-genotyped SNPs were imputed based on haplotypes derived from TOPMED reference panel 5b using Michigan Imputation Server (<https://imputationserver.sph.umich.edu>).

### ***Longitudinal cohort of UK Biobank***

All samples were genotyped using the UK BiLEVE Axiom Array (807,411 markers tested for 49,950 participants) or UK Biobank Axiom Array (825,927 markers tested for 438,427 participants) by Affymetrix. The genotyping data were imputed using SHAPEIT3 and IMPUTE3 based on the reference panels of HRC, UK10K and 1000 Genomes Project (Phase 3). The study protocol and information about data access are available online (<http://www.ukbiobank.ac.uk/wp-content/uploads/2011/11/UK-Biobank-Protocol.pdf>) and more details of the recruitment and study design have been published in previous

studies [9, 10].

For each GWAS, the imputed SNPs located within autosomal chromosomes were removed if they had (i) minor allele frequency (MAF)  $< 0.01$ ; (ii) call rate  $< 95\%$ ; (iii) Hardy-Weinberg equilibrium (HWE)  $P$ -value in controls  $< 1 \times 10^{-6}$  and (iv) information metric (info score)  $< 0.3$ .

### **Functional annotation and expression quantitative trait loci (eQTL) analysis**

We performed functional annotation for novel loci based on HaploReg v4.1 (<http://archive.broadinstitute.org/mammals/haploreg/haploreg.php>), RegulomeDB (<http://regulome.stanford.edu/>) and SNPinfo Web Server (<http://snpinfo.niehs.nih.gov/>). Besides, to examine predicted functional impact, we annotated variants with the CADD score (Phred scores  $>20$  predicted as deleterious, <https://cadd.gs.washington.edu/score>).

Furthermore, we performed eQTL analysis between novel loci and their nearby genes (within  $\pm 1$  Mb region) using the data from the Genotype-Tissue Expression (GTEx), in which normal Colon-Sigmoid tissues and Colon-Transverse tissues were included in the analysis, the details can be found in the GTEx website (<https://www.gtexportal.org/home/>).

### **Calculation of polygenic risk score (PRS)**

#### ***Known GWAS-identified variant-based PRS***

We used colorectal cancer GWAS-identified variants for the construction of

EAS-ancestry and EUR-ancestry PRSs. For the EUR-ancestry PRS, we used the previously reported 140 independent variants for calculation [11]. For the EAS-ancestry PRS, a total of 37 independent SNPs (LD  $r^2 < 0.1$ ; **Additional File 1: Table S3**) were collected for construction. The weights of the two PRSs were derived from previous GWASs.

### ***Clumping and $P$ value thresholding***

The clumping and  $P$  value thresholding approach, a classic PRS method, commonly known as C+T method, which constructed PRSs based on a subset of partially independent (i.e., clumped) SNPs exceeding a specific GWAS association  $P$  value threshold [12]. Based on the summary statistics of EAS-EUR meta-analysis, we used PLINK software (version 1.90) to determine three subsets of variants, where we set the region size to be 500 kb and the linkage disequilibrium (LD)  $r^2$  to 0.001, 0.01 and 0.1, with different  $P$  value thresholds (i.e.,  $5 \times 10^{-8}$ ,  $5 \times 10^{-6}$ ,  $5 \times 10^{-4}$  and 0.05).

### ***LDpred***

LDpred is a Bayesian genome-wide genetic risk prediction method by calculating a posterior mean effect size for each variant based on a prior and subsequent shrinkage based on the LD among SNPs, implemented in the LDpred python software [13]. First, we restricted the variants to the HapMap3 panel to circumvent the non-convergence issue from training on summary statistics of EAS-EUR meta-analysis. Subsequently, the fraction of causal (i.e., non-zero effect sizes) variants was set as 1, 0.3, 0.1, 0.03, 0.01, 0.003, 0.001,  $3 \times 10^{-4}$ ,  $1 \times 10^{-4}$ ,  $3 \times 10^{-5}$  and  $1 \times 10^{-5}$ , to construct 11 candidate PRSs.

### ***Lassosum***

Lassosum was used to construct PRS based on a penalized regression framework taking into account LD information from a reference panel, which was implemented with the R package *lassosum* [14]. Based on the summary statistics of EAS-EUR meta-analysis, we selected the optimal elastic net tuning parameters ( $s$  and  $\lambda$ ) validated in the target dataset (i.e., CORSA GWAS) to define the lassosum-based PRS.

### ***LDpred2***

LDpred2 is an extension of the LDpred method which derives the PRS based on summary statistics and a matrix of correlation between genetic variants, which was implemented with the R package *bigsnpr* [15]. We used the LDpred-auto model (i.e., automatically estimates sparsity  $P$  and heritability  $h^2$  from the reference panel) to construct PRS, based on the EAS-EUR meta-analyzed summary statistics that were restricted in HapMap3 panel.

### ***PRS-CSx***

PRS-CSx, a recently proposed Bayesian polygenic modeling method, has been demonstrated to be useful for constructing trans-ancestry PRS [16, 17]. We applied PRS-CSx python software to jointly model GWAS summary statistics in HapMap3 panel across two populations using a shared continuous shrinkage prior, which enabled more accurate effect size estimation. We used the pre-computed 1000 Genomes Project reference panels, and a fully Bayesian algorithm for model fitting, which automatically learned all model parameters without the need for

hyper-parameter tuning. Population-specific posterior effect size estimates were further combined using an inverse-variance-weighted meta-analysis within the Gibbs sampler (--meta).

### **Construction of lifestyle score**

The score for each lifestyle factor was created by evaluating whether they met (i.e., 1) or not met (i.e., 0) the guidelines as follows (**Additional File 1: Table S4**): BMI, weight (kg) / height (m<sup>2</sup>), was classified into healthy behavior category if they were within 18.5–24.9. Tobacco smoking and alcohol consumption with "Never" status were considered the healthy category. WHR, waist-to-hip ratio, met a healthy lifestyle requirement if it <0.90 for men and <0.85 for women. Participants were classified as having met current physical activity recommendations if they reported 6–7 days per week of moderate activity and 3–5 days per week of vigorous activity, or 6–7 days per week of vigorous activity. Sedentary time was calculated based on the sum of the time watching television and using computer. Less than 3 hours per day was considered healthy. For red and processed meat, we summed the frequencies for beef, pork, lamb/mutton, and processed meat, using the following coding: "Never" = 0, "Less than once a week" = 0.5, "Once a week" = 1, "2-4 times a week" = 3, "5-6 times a week" = 5.5 and "Once or more daily" = 7. We classified < 4 times per week into healthy behavior category. For fruit, participants were asked to enter the number of pieces of fresh fruit and dried fruit. one piece of fresh fruit, and two 'pieces' of dried fruit were counted as a serving. For vegetables, participants were asked to enter the number of heaped tablespoons of cooked vegetables and salad/raw vegetables eaten

per day. Two heaped tablespoons of vegetables were counted as a serving. We summed the servings of vegetable and fruit take, and  $>5$  servings per day was considered the healthy category.

**Table S1.** Basic characteristics of colorectal cancer GWASs.

| Stage      | Population   | GWAS study | Variables                 | Cases             | Controls          |
|------------|--------------|------------|---------------------------|-------------------|-------------------|
| Derivation | EAS/Chinese  | NJCRC      | Sex                       | 1,316             | 2,207             |
|            |              |            | Male                      | 794               | 1,290             |
|            |              |            | Female                    | 522               | 917               |
|            |              |            | Age (year), mean $\pm$ SD | 58.34 $\pm$ 12.85 | 57.87 $\pm$ 21.75 |
|            |              | BJCRC      | Sex                       | 932               | 966               |
|            |              |            | Male                      | 547               | 490               |
|            |              |            | Female                    | 385               | 476               |
|            |              |            | Age (year), mean $\pm$ SD | 61.76 $\pm$ 13.75 | 60.98 $\pm$ 12.91 |
|            |              | SHCRC      | Sex                       | 1,116             | 1,054             |
|            |              |            | Male                      | 675               | 725               |
|            |              |            | Female                    | 441               | 316               |
|            |              |            | Age (year), mean $\pm$ SD | 60.62 $\pm$ 11.68 | 59.65 $\pm$ 10.61 |
|            |              | ZJCRC      | Sex                       | 1,046             | 1,184             |
|            |              |            | Male                      | 603               | 1,055             |
|            |              |            | Female                    | 443               | 129               |
|            |              |            | Age (year), mean $\pm$ SD | 62.25 $\pm$ 11.74 | 56.76 $\pm$ 12.48 |
|            | EAS/Japanese | BBJ        | Sex                       | 7,062             | 195,745           |
|            |              |            | Male                      | 4,496             | 97,655            |
|            |              |            | Female                    | 2,566             | 98,090            |
|            |              |            | Age (year), mean $\pm$ SD | 67.00 $\pm$ 10.2  | 61.6 $\pm$ 13.9   |
| Validation | EAS/Chinese  | JSCRC      | Sex                       | 21,608            | 20,278            |
|            |              |            | Male                      | 11,236            | 9,584             |
|            |              |            | Female                    | 10,372            | 10,694            |
|            |              |            | Age (year), mean $\pm$ SD | 63.76 $\pm$ 10.62 | 60.85 $\pm$ 11.65 |
|            |              | PLCO       | Sex                       | 2,065             | 67,500            |
|            |              |            | Male                      | 1,126             | 30,710            |
|            |              |            | Female                    | 939               | 36,780            |
|            |              |            | Age (year), mean $\pm$ SD | 61.13 $\pm$ 12.49 | 61.16 $\pm$ 10.98 |
| Validation | EUR          | CORSAC     | Sex                       | 1,289             | 1,284             |
|            |              |            | Sex                       |                   |                   |

|                           |                   |                   |
|---------------------------|-------------------|-------------------|
| Male                      | 837               | 832               |
| Female                    | 452               | 452               |
| Age (year), mean $\pm$ SD | 66.21 $\pm$ 10.73 | 58.02 $\pm$ 13.08 |

Note: GWAS, genome-wide association studies; EAS, East Asian population; EUR, European population; BBJ, BioBank Japan Project; GECCO, Genetics and Epidemiology of Colorectal Cancer Consortium; PLCO, Prostate, Lung, Colorectal and Ovarian cancer screening trial; CORSA, Colorectal Cancer Study of Austria.

**Table S2.** Basic characteristics of the UK Biobank cohort.

| Variables                               |                   | All participants<br>(N = 355,543) | Colorectal cancer<br>(N = 2,621) | Non-colorectal cancer<br>(N = 352,922) |
|-----------------------------------------|-------------------|-----------------------------------|----------------------------------|----------------------------------------|
| Sex                                     | Male              | 167,517                           | 1,555                            | 165,962                                |
|                                         | Female            | 188,026                           | 1,066                            | 186,960                                |
| Age <sup>a</sup> (year), mean $\pm$ SD  |                   | 56.79 $\pm$ 7.95                  | 60.93 $\pm$ 6.34                 | 56.76 $\pm$ 7.95                       |
| BMI (kg/m <sup>3</sup> ), mean $\pm$ SD |                   | 27.42 $\pm$ 4.75                  | 27.94 $\pm$ 4.59                 | 27.42 $\pm$ 4.75                       |
| Smoking status                          | Yes               | 160,163                           | 1,412                            | 158,751                                |
|                                         | No                | 194,203                           | 1,203                            | 193,000                                |
|                                         | Missing           | 1,177                             | 6                                | 1,171                                  |
| Drinking status                         | Yes               | 344,417                           | 2,539                            | 341,878                                |
|                                         | No                | 10,821                            | 78                               | 10,743                                 |
|                                         | Missing           | 305                               | 4                                | 301                                    |
| Assessment center                       | Stockport (pilot) | 338                               | 4                                | 334                                    |
|                                         | Manchester        | 9,492                             | 92                               | 9,400                                  |
|                                         | Oxford            | 10,253                            | 95                               | 10,158                                 |
|                                         | Cardiff           | 13,566                            | 117                              | 13,449                                 |
|                                         | Glasgow           | 13,463                            | 115                              | 13,348                                 |
|                                         | Edinburgh         | 13,044                            | 111                              | 12,933                                 |
|                                         | Stoke             | 14,997                            | 116                              | 14,881                                 |
|                                         | Reading           | 21,633                            | 173                              | 21,460                                 |
|                                         | Bury              | 21,313                            | 175                              | 21,138                                 |
|                                         | Newcastle         | 28,388                            | 218                              | 28,170                                 |
|                                         | Leeds             | 32,503                            | 232                              | 32,271                                 |
|                                         | Bristol           | 32,404                            | 240                              | 32,164                                 |
|                                         | Barts             | 5,968                             | 43                               | 5,925                                  |
|                                         | Nottingham        | 25,909                            | 176                              | 25,733                                 |
|                                         | Sheffield         | 23,250                            | 144                              | 23,106                                 |
|                                         | Liverpool         | 24,158                            | 180                              | 23,978                                 |
|                                         | Middlesbrough     | 16,303                            | 92                               | 16,211                                 |
|                                         | Hounslow          | 14,908                            | 101                              | 14,807                                 |
|                                         | Croydon           | 15,172                            | 89                               | 15,083                                 |
|                                         | Birmingham        | 16,308                            | 93                               | 16,215                                 |
|                                         | Swansea           | 1,672                             | 13                               | 1,659                                  |
|                                         | Wrexham           | 501                               | 2                                | 499                                    |

<sup>a</sup> Age at baseline.

Note: BMI, body mass index.

**Table S3.** Summary of 37 colorectal cancer GWAS-reported SNPs in East Asian population.

| SNP         | Locus    | Position <sup>a</sup> | Allele <sup>b</sup> | OR <sup>c</sup> | PMID <sup>d</sup> |
|-------------|----------|-----------------------|---------------------|-----------------|-------------------|
| rs201395236 | 1q44     | 245181421             | T/C                 | 1.75            | 30529582          |
| rs7542665   | 1p31.3   | 62673037              | C/T                 | 1.08            | 30529582          |
| rs7606562   | 2p16.3   | 48686695              | T/A                 | 1.10            | 30529582          |
| rs113569514 | 3q22.2   | 133748789             | T/C                 | 1.10            | 30529582          |
| rs12522693  | 5q23.3   | 130195731             | A/G                 | 1.31            | 26515597          |
| rs12659017  | 5q23.2   | 125988175             | G/A                 | 1.09            | 30529582          |
| rs647161    | 5q31.1   | 134499092             | A/C                 | 1.17            | 23263487          |
| rs1476570   | 6p22.1   | 29809860              | A/G                 | 1.12            | 30529582          |
| rs3830041   | 6p21.32  | 32191339              | T/C                 | 1.16            | 30529582          |
| rs4711689   | 6p21.1   | 41692812              | A/G                 | 1.11            | 26965516          |
| rs7758229*  | 6q25.3   | 160840252             | T/G                 | 1.28            | 21242260          |
| rs2450115   | 8q23.3   | 117624093             | T/C                 | 1.12            | 26965516          |
| rs6983267   | 8q24.21  | 128413305             | G/T                 | 1.18            | 21242260          |
| rs10506868  | 10q25.2  | 114319380             | T/C                 | 1.10            | 26965516          |
| rs11196172  | 10q25.2  | 114726843             | A/G                 | 1.14            | 24836286          |
| rs1665650   | 10q25.3  | 118487100             | T/C                 | 1.13            | 23263487          |
| rs4919687   | 10q24.32 | 104595248             | G/A                 | 1.14            | 26965516          |
| rs704017    | 10q22.3  | 80819132              | G/A                 | 1.10            | 24836286          |
| rs174537    | 11q12.2  | 61552680              | G/T                 | 1.16            | 24836286          |
| rs10774214  | 12p13.32 | 4368352               | T/C                 | 1.17            | 23263487          |
| rs10849432  | 12p13.31 | 6385727               | T/C                 | 1.14            | 24836286          |
| rs11108175  | 12q22    | 96050887              | A/G                 | 1.08            | 31826910          |
| rs2238126   | 12p13.2  | 12009741              | G/A                 | 1.17            | 27145994          |
| rs2730985   | 12q12    | 43130624              | G/A                 | 1.08            | 30529582          |
| rs77969132  | 12p11.21 | 31594813              | T/C                 | 1.44            | 30529582          |
| rs9634162   | 12q24.21 | 115098094             | A/G                 | 1.07            | 31826910          |
| rs1886450   | 13q22.1  | 73986628              | G/A                 | 1.09            | 30529582          |
| rs4341754   | 16q23.2  | 80039621              | G/C                 | 1.09            | 30529582          |
| rs847208    | 16q24.1  | 86254051              | A/C                 | 1.11            | 29471430          |
| rs12603526  | 17p13.3  | 800593                | C/T                 | 1.10            | 24836286          |
| rs17836917  | 17q12    | 32047282              | G/A                 | 1.33            | 26515597          |
| rs7229639   | 18q21.1  | 46450976              | A/G                 | 1.22            | 24448986          |
| rs2241714   | 19q13.2  | 41869392              | C/T                 | 1.09            | 24836286          |
| rs13831     | 20q13.32 | 57475191              | G/A                 | 1.08            | 30529582          |
| rs2423279   | 20p12.3  | 7812350               | C/T                 | 1.14            | 23263487          |
| rs6061231   | 20q13.33 | 60956917              | C/A                 | 1.18            | 26965516          |
| rs6065668   | 20q13.12 | 42532821              | T/C                 | 1.11            | 29471430          |

<sup>a</sup> Chromosomal position, hg19/GRCh37 build.

<sup>b</sup> Risk/reference allele.

<sup>c</sup> Reported OR value from previous East Asian GWASs.

<sup>d</sup> PubMed ID.

\*Associated with distal colon cancer risk in GWAS.

Note: GWAS, genome-wide association study; SNP, single nucleotide polymorphism; OR, odds ratio; 95% CI, 95% confidence interval; PRS, polygenic risk score.

**Table S4.** Summary of eight lifestyle factors in the UK Biobank cohort.

| Lifestyle factor <sup>a</sup>        | All participants<br>(N = 355,543) | Colorectal cancer<br>(N = 2,621) | Non-colorectal cancer<br>(N = 352,922) | HR (95% CI) <sup>b</sup> | P <sup>b</sup> |
|--------------------------------------|-----------------------------------|----------------------------------|----------------------------------------|--------------------------|----------------|
| <b>BMI</b>                           |                                   |                                  |                                        |                          |                |
| 1                                    | 111,276                           | 672                              | 110,604                                | 0.88 (0.80, 0.96)        | 0.004          |
| 0                                    | 243,149                           | 1,938                            | 241,211                                | 1.00 (reference)         |                |
| Missing                              | 1,118                             | 11                               | 1,107                                  |                          |                |
| <b>Smoking status</b>                |                                   |                                  |                                        |                          |                |
| 1                                    | 194,203                           | 1,203                            | 193,000                                | 0.82 (0.76, 0.88)        | 3.58E-07       |
| 0                                    | 160,163                           | 1,412                            | 158,751                                | 1.00 (reference)         |                |
| Missing                              | 1,177                             | 6                                | 1,171                                  |                          |                |
| <b>Drinking status</b>               |                                   |                                  |                                        |                          |                |
| 1                                    | 10,821                            | 78                               | 10,743                                 | 0.93 (0.74, 1.17)        | 0.551          |
| 0                                    | 344,417                           | 2,539                            | 341,878                                | 1.00 (reference)         |                |
| Missing                              | 305                               | 4                                | 301                                    |                          |                |
| <b>WHR</b>                           |                                   |                                  |                                        |                          |                |
| 1                                    | 178,482                           | 961                              | 177,521                                | 0.75 (0.69, 0.82)        | 1.60E-10       |
| 0                                    | 176,418                           | 1,654                            | 174,764                                | 1.00 (reference)         |                |
| Missing                              | 643                               | 6                                | 637                                    |                          |                |
| <b>Physical activity</b>             |                                   |                                  |                                        |                          |                |
| 1                                    | 47,581                            | 325                              | 47,256                                 | 0.90 (0.80, 1.01)        | 0.065          |
| 0                                    | 281,439                           | 2,052                            | 279,387                                | 1.00 (reference)         |                |
| Missing                              | 26,523                            | 244                              | 26,279                                 |                          |                |
| <b>Sedentary time</b>                |                                   |                                  |                                        |                          |                |
| 1                                    | 100,797                           | 598                              | 100,199                                | 0.91 (0.83, 1.00)        | 0.050          |
| 0                                    | 250,048                           | 1,982                            | 248,066                                | 1.00 (reference)         |                |
| Missing                              | 4,698                             | 41                               | 4,657                                  |                          |                |
| <b>Red and processed meat intake</b> |                                   |                                  |                                        |                          |                |
| 1                                    | 204,545                           | 1,335                            | 203,210                                | 0.84 (0.77, 0.90)        | 7.75E-06       |
| 0                                    | 147,507                           | 1,262                            | 146,245                                | 1.00 (reference)         |                |
| Missing                              | 3,491                             | 24                               | 3,467                                  |                          |                |
| <b>Vegetable and fruit intake</b>    |                                   |                                  |                                        |                          |                |
| 1                                    | 135,142                           | 995                              | 134,147                                | 0.96 (0.89, 1.04)        | 0.369          |
| 0                                    | 211,808                           | 1,549                            | 210,259                                | 1.00 (reference)         |                |
| Missing                              | 8,593                             | 77                               | 8,516                                  |                          |                |

<sup>a</sup> Each lifestyle factor was given a score of 0 or 1, with 1 representing the healthy category (BMI, 18.5-24.9 kg/m<sup>3</sup>; smoking status, never; drinking status, never; WHR, < 0.85 for women, or < 0.90 for men; physical activity, 6–7 days per week of moderate activity and 3–5 days per week of vigorous activity, or 6–7 days per week of vigorous activity; sedentary time, < 3 hours per day; red and processed meat intake, < 4 times per week; vegetable and fruit intake, > 5 servings per day). Note: BMI, body mass index. WHR, waist-to-hip ratio.

<sup>b</sup> With the adjustment of sex, age, center and first 10 principal components.

Note: BMI, body mass index; WHR, waist-to-hip ratio.

**Table S5.** Summary of one novel EAS-EUR conditionally independent variant at known colorectal cancer risk loci.

| Locus  | SNP       | Position <sup>a</sup> | Allele <sup>b</sup> | RAF <sup>c</sup> |       | Ancestry <sup>d</sup> | OR (95% CI)       | <i>P</i> | <i>I</i> <sup>2</sup> | <i>P</i> <sub>het</sub> <sup>e</sup> | OR <sub>conditional</sub> (95% CI) <sup>f</sup> | <i>P</i> <sup>f</sup> |
|--------|-----------|-----------------------|---------------------|------------------|-------|-----------------------|-------------------|----------|-----------------------|--------------------------------------|-------------------------------------------------|-----------------------|
|        |           |                       |                     | EAS              | EUR   |                       |                   |          |                       |                                      |                                                 |                       |
| 3p14.1 | rs7623129 | 64624426              | C/T                 | 0.455            | 0.534 | EAS                   | 1.05 (1.02, 1.09) | 0.002    |                       |                                      |                                                 |                       |
|        |           |                       |                     |                  |       | EUR                   | 1.06 (1.04, 1.09) | 3.66E-06 |                       |                                      | 1.06 (1.04, 1.08)                               | 1.18E-08              |
|        |           |                       |                     |                  |       | Combined              | 1.06 (1.04, 1.08) | 2.68E-08 | 0%                    | 0.714                                |                                                 |                       |

<sup>a</sup> Chromosomal position, hg19/GRCh37 build.

<sup>b</sup> Risk/reference allele.

<sup>c</sup> Risk allele frequency from the 1000 Genomes Project (Phase 3) used in this study.

<sup>d</sup> Combined: Meta-analysis.

<sup>e</sup> *P* value for heterogeneity test.

<sup>f</sup> Conditional analysis on previously GWAS variants on 3p14.1.

Note: EAS, East Asian; EUR, European; OR, odds ratio; 95% CI, 95% confidence interval; GWAS, genome-wide association study; SNP, single nucleotide polymorphism.

**Table S6.** Functional annotations of one novel colorectal cancer risk locus.

| Locus  | SNP       | Nearest gene   | Enhancer histone marks | DNase   | Regulome DB score <sup>a</sup> | CADD (Phred) | Nearby egenes <sup>c</sup> |
|--------|-----------|----------------|------------------------|---------|--------------------------------|--------------|----------------------------|
| 3p14.1 | rs7623129 | <i>ADAMTS9</i> | ESDR, ESC, BRN         | BRN,BRN | 5                              | < 5          | <i>ADAMTS9</i>             |

<sup>a</sup> Regulome DB Score: 5, TF binding or DNase peak.

<sup>c</sup> egenes were identified using eQTL analysis with *P* value < 0.05 in sigmoid or transverse tissues.

**Table S7.** The association of PRS with colorectal cancer risk in the UK Biobank cohort.

| Model                | PRS          | Cases/All     | HR (95% CI)       | <i>P</i> | <i>P</i> <sub>trend</sub> |
|----------------------|--------------|---------------|-------------------|----------|---------------------------|
| Model 1 <sup>a</sup> | Continuous   | Per SD        | 1.42 (1.37, 1.48) | 3.53E-72 |                           |
|                      | Low          | 121/35,555    | 1.00 (reference)  |          |                           |
|                      | Intermediate | 2,036/284,433 | 2.11 (1.76, 2.54) | 1.30E-15 |                           |
|                      | High         | 464/35,555    | 3.88 (3.18, 4.74) | 2.82E-40 | 8.15E-53                  |
| Model 2 <sup>b</sup> | Continuous   | Per SD        | 1.42 (1.36, 1.48) | 1.72E-63 |                           |
|                      | Low          | 121/35,555    | 1.00 (reference)  |          |                           |
|                      | Intermediate | 2,036/284,433 | 2.22 (1.82, 2.71) | 5.32E-15 |                           |
|                      | High         | 464/35,555    | 3.92 (3.16, 4.88) | 9.46E-35 | 3.58E-44                  |

<sup>a</sup> Model 1, based on Cox regression model with the adjustment of sex, age, center and first 10 principal components.

<sup>b</sup> Model 2, based on Cox regression model with the adjustment of sex, age, center, lifestyle score and first 10 principal components.

Note: PRS, polygenic risk score; HR, hazard ratio; 95% CI, 95% confidence interval; SD, standard deviation.

**Table S8.** Sensitivity analyses for the association of PRS with colorectal cancer risk in the UK Biobank cohort.

| Sensitivity analyses                                                                                | Model                | PRS          | Cases/All     | HR (95% CI)       | <i>P</i> | <i>P</i> <sub>trend</sub> |
|-----------------------------------------------------------------------------------------------------|----------------------|--------------|---------------|-------------------|----------|---------------------------|
| Excluded colorectal cancer patients occurred within the first year of follow-up                     | Model 1 <sup>a</sup> | Low          | 108/35,542    | 1.00 (reference)  |          |                           |
|                                                                                                     |                      | Intermediate | 1,812/284,209 | 2.11 (1.73, 2.56) | 5.41E-14 |                           |
|                                                                                                     |                      | High         | 415/35,506    | 3.89 (3.15, 4.81) | 2.86E-36 | 1.04E-47                  |
|                                                                                                     | Model 2 <sup>b</sup> | Low          | 108/35,542    | 1.00 (reference)  |          |                           |
|                                                                                                     |                      | Intermediate | 1,812/284,209 | 2.21 (1.79, 2.72) | 2.15E-13 |                           |
|                                                                                                     |                      | High         | 415/35,506    | 3.98 (3.16, 5.01) | 7.72E-32 | 5.07E-41                  |
| Ancestry-corrected PRS                                                                              | Model 1 <sup>c</sup> | Low          | 121/35,555    | 1.00 (reference)  |          |                           |
|                                                                                                     |                      | Intermediate | 2,041/284,433 | 2.13 (1.77, 2.55) | 7.88E-16 |                           |
|                                                                                                     |                      | High         | 459/35,555    | 3.87 (3.16, 4.72) | 5.78E-40 | 7.06E-52                  |
|                                                                                                     | Model 2 <sup>d</sup> | Low          | 121/35,555    | 1.00 (reference)  |          |                           |
|                                                                                                     |                      | Intermediate | 2,041/284,433 | 2.20 (1.81, 2.69) | 6.24E-15 |                           |
|                                                                                                     |                      | High         | 459/35,555    | 3.87 (3.12, 4.81) | 2.51E-34 | 2.72E-43                  |
| Excluded non-colorectal cancer individuals with other cancers occurred within the time of follow-up | Model 1 <sup>a</sup> | Low          | 121/33,315    | 1.00 (reference)  |          |                           |
|                                                                                                     |                      | Intermediate | 2,036/265,424 | 2.12 (1.77, 2.55) | 8.21E-16 |                           |
|                                                                                                     |                      | High         | 464/33,114    | 3.91 (3.2, 4.78)  | 9.87E-41 | 2.15E-53                  |
|                                                                                                     | Model 2 <sup>b</sup> | Low          | 121/33,315    | 1.00 (reference)  |          |                           |
|                                                                                                     |                      | Intermediate | 2,036/265,424 | 2.23 (1.83, 2.72) | 3.46E-15 |                           |
|                                                                                                     |                      | High         | 464/33,114    | 3.96 (3.18, 4.92) | 3.46E-35 | 9.57E-45                  |

<sup>a</sup> Model 1, based on Cox regression model with the adjustment of sex, age, center and first 10 principal components.

<sup>b</sup> Model 2, based on Cox regression model with the adjustment of sex, age, center, lifestyle score and first 10 principal components.

<sup>c</sup> Model 1, based on Cox regression model with the adjustment of sex, age and center.

<sup>d</sup> Model 2, based on Cox regression model with the adjustment of sex, age, center and lifestyle score.

Note: PRS, polygenic risk score; HR, hazard ratio; 95% CI, 95% confidence interval.

**Table S9.** The association of lifestyle score with colorectal cancer risk in the UK Biobank cohort.

| Model                | Lifestyle    | Cases/All     | HR (95% CI)       | <i>P</i> | <i>P</i> <sub>trend</sub> |
|----------------------|--------------|---------------|-------------------|----------|---------------------------|
| Model 1 <sup>a</sup> | Continuous   | Per score     | 0.90 (0.88, 0.93) | 3.39E-12 |                           |
|                      | Unfavorable  | 713/68,426    | 1.00 (reference)  |          |                           |
|                      | Intermediate | 1,035/144,059 | 0.79 (0.72, 0.87) | 2.86E-06 |                           |
|                      | Favorable    | 544/105,456   | 0.65 (0.58, 0.74) | 2.56E-12 | 1.92E-12                  |
| Model 2 <sup>b</sup> | Continuous   | Per score     | 0.90 (0.88, 0.93) | 9.69E-12 |                           |
|                      | Unfavorable  | 713/68,426    | 1.00 (reference)  |          |                           |
|                      | Intermediate | 1,035/144,059 | 0.79 (0.72, 0.88) | 3.65E-06 |                           |
|                      | Favorable    | 544/105,456   | 0.66 (0.58, 0.74) | 7.17E-12 | 5.34E-12                  |

<sup>a</sup> Model 1, based on Cox regression model with the adjustment of sex, age, center and first 10 principal components.

<sup>b</sup> Model 2, based on Cox regression model with the adjustment of sex, age, center, polygenic risk score (PRS) and first 10 principal components.

Note: HR, hazard ratio; 95% CI, 95% confidence interval.

**Table S10.** Sensitivity analyses for the association of lifestyle score with colorectal cancer risk in the UK Biobank cohort.

| Sensitivity analyses                                                                                | Model                | Lifestyle    | Cases/All     | HR (95% CI)       | <i>P</i> | <i>P</i> <sub>trend</sub> |
|-----------------------------------------------------------------------------------------------------|----------------------|--------------|---------------|-------------------|----------|---------------------------|
| Excluded colorectal cancer patients occurred within the first year of follow-up                     | Model 1 <sup>a</sup> | Unfavorable  | 631/68,344    | 1.00 (reference)  |          |                           |
|                                                                                                     |                      | Intermediate | 920/143,944   | 0.79 (0.71, 0.88) | 8.45E-06 |                           |
|                                                                                                     |                      | Favorable    | 490/105,402   | 0.66 (0.58, 0.74) | 5.56E-11 | 4.40E-11                  |
|                                                                                                     | Model 2 <sup>b</sup> | Unfavorable  | 631/68,344    | 1.00 (reference)  |          |                           |
|                                                                                                     |                      | Intermediate | 920/143,944   | 0.79 (0.71, 0.88) | 1.07E-05 |                           |
|                                                                                                     |                      | Favorable    | 490/105,402   | 0.66 (0.58, 0.75) | 1.41E-10 | 1.11E-10                  |
| Reclassified lifestyle categories                                                                   | Model 1 <sup>a</sup> | Unfavorable  | 1,274/139,616 | 1.00 (reference)  |          |                           |
|                                                                                                     |                      | Intermediate | 780/130,317   | 0.78 (0.71, 0.85) | 9.97E-08 |                           |
|                                                                                                     |                      | Favorable    | 238/48,008    | 0.71 (0.61, 0.82) | 2.94E-06 | 2.43E-09                  |
|                                                                                                     | Model 2 <sup>b</sup> | Unfavorable  | 1,274/139,616 | 1.00 (reference)  |          |                           |
|                                                                                                     |                      | Intermediate | 780/130,317   | 0.78 (0.71, 0.86) | 1.36E-07 |                           |
|                                                                                                     |                      | Favorable    | 238/48,008    | 0.72 (0.62, 0.83) | 5.37E-06 | 5.06E-09                  |
| Excluded non-colorectal cancer individuals with other cancers occurred within the time of follow-up | Model 1 <sup>a</sup> | Unfavorable  | 713/63,031    | 1.00 (reference)  |          |                           |
|                                                                                                     |                      | Intermediate | 1,035/134,596 | 0.79 (0.71, 0.87) | 1.31E-06 |                           |
|                                                                                                     |                      | Favorable    | 544/99,542    | 0.64 (0.57, 0.73) | 4.43E-13 | 3.28E-13                  |
|                                                                                                     | Model 2 <sup>b</sup> | Unfavorable  | 713/63,031    | 1.00 (reference)  |          |                           |
|                                                                                                     |                      | Intermediate | 1,035/134,596 | 0.79 (0.71, 0.87) | 1.77E-06 |                           |
|                                                                                                     |                      | Favorable    | 544/99,542    | 0.65 (0.58, 0.73) | 1.37E-12 | 1.01E-12                  |

<sup>a</sup> Model 1, based on Cox regression model with the adjustment of sex, age, center and first 10 principal components.

<sup>b</sup> Model 2, based on Cox regression model with the adjustment of sex, age, center, polygenic risk score (PRS) and first 10 principal components.

Note: HR, hazard ratio; 95% CI, 95% confidence interval.

**Table S11.** Sensitivity analyses for cumulative risk of developing colorectal cancer according to different levels of PRS and lifestyle score in the UK Biobank cohort.

| Sensitivity analyses                                                                  | PRS          | Lifestyle    | Cases/All   | Incidence proportion<br>(95% CI) | HR (95% CI) <sup>a</sup> | <i>P</i> <sup>a</sup> | <i>P</i> <sub>trend</sub> |
|---------------------------------------------------------------------------------------|--------------|--------------|-------------|----------------------------------|--------------------------|-----------------------|---------------------------|
| Excluded colorectal cancer patients<br>occurred within the first<br>year of follow-up | Low          | Unfavorable  | 26/6,643    | 0.39% (0.26, 0.57)               | 1.00 (reference)         |                       |                           |
|                                                                                       |              | Intermediate | 44/14,335   | 0.31% (0.22, 0.41)               | 0.89 (0.54, 1.46)        | 0.641                 |                           |
|                                                                                       |              | Favorable    | 21/10,912   | 0.19% (0.12, 0.29)               | 0.64 (0.35, 1.19)        | 0.157                 | 0.157                     |
|                                                                                       | Intermediate | Unfavorable  | 499/54,678  | 0.91% (0.83, 1.00)               | 1.00 (reference)         |                       |                           |
|                                                                                       |              | Intermediate | 720/115,227 | 0.62% (0.58, 0.67)               | 0.78 (0.7, 0.88)         | 4.77E-05              |                           |
|                                                                                       |              | Favorable    | 376/84,288  | 0.45% (0.4, 0.49)                | 0.64 (0.56, 0.74)        | 1.12E-09              | 8.89E-10                  |
|                                                                                       | High         | Unfavorable  | 106/7,023   | 1.51% (1.24, 1.83)               | 1.00 (reference)         |                       |                           |
|                                                                                       |              | Intermediate | 156/14,382  | 1.08% (0.92, 1.27)               | 0.80 (0.62, 1.03)        | 0.083                 |                           |
|                                                                                       |              | Favorable    | 93/10,202   | 0.91% (0.74, 1.12)               | 0.76 (0.56, 1.02)        | 0.066                 | 0.066                     |
| Ancestry-corrected PRS                                                                | Low          | Unfavorable  | 34/6,668    | 0.51% (0.35, 0.71)               | 1.00 (reference)         |                       |                           |
|                                                                                       |              | Intermediate | 46/14,326   | 0.32% (0.24, 0.43)               | 0.73 (0.46, 1.15)        | 0.176                 |                           |
|                                                                                       |              | Favorable    | 23/10,903   | 0.21% (0.13, 0.32)               | 0.57 (0.32, 1)           | 0.049                 | 0.047                     |
|                                                                                       | Intermediate | Unfavorable  | 565/54,752  | 1.03% (0.95, 1.12)               | 1.00 (reference)         |                       |                           |
|                                                                                       |              | Intermediate | 810/115,269 | 0.70% (0.66, 0.75)               | 0.78 (0.7, 0.87)         | 1.38E-05              |                           |
|                                                                                       |              | Favorable    | 424/84,360  | 0.50% (0.46, 0.55)               | 0.64 (0.56, 0.74)        | 1.57E-10              | 1.18E-10                  |
|                                                                                       | High         | Unfavorable  | 114/7,006   | 1.63% (1.34, 1.95)               | 1.00 (reference)         |                       |                           |
|                                                                                       |              | Intermediate | 179/14,464  | 1.24% (1.06, 1.43)               | 0.86 (0.67, 1.09)        | 0.206                 |                           |
|                                                                                       |              | Favorable    | 97/10,193   | 0.95% (0.77, 1.16)               | 0.75 (0.56, 1)           | 0.052                 | 0.052                     |
| Reclassified lifestyle<br>categories                                                  | Low          | Unfavorable  | 64/13,827   | 0.46% (0.36, 0.59)               | 1.00 (reference)         |                       |                           |
|                                                                                       |              | Intermediate | 31/12,984   | 0.24% (0.16, 0.34)               | 0.60 (0.39, 0.94)        | 0.025                 |                           |
|                                                                                       |              | Favorable    | 7/5,090     | 0.14% (0.06, 0.28)               | 0.39 (0.17, 0.86)        | 0.020                 | 0.004                     |

|                                                                                                     |              |              |               |                    |                   |          |          |
|-----------------------------------------------------------------------------------------------------|--------------|--------------|---------------|--------------------|-------------------|----------|----------|
| Excluded non-colorectal cancer individuals with other cancers occurred within the time of follow-up | Intermediate | Unfavorable  | 1,006/111,636 | 0.90% (0.85, 0.96) | 1.00 (reference)  |          |          |
|                                                                                                     |              | Intermediate | 606/10,4451   | 0.58% (0.53, 0.63) | 0.77 (0.69, 0.85) | 6.03E-07 |          |
|                                                                                                     |              | Favorable    | 185/38,308    | 0.48% (0.42, 0.56) | 0.70 (0.6, 0.83)  | 2.39E-05 | 4.27E-08 |
|                                                                                                     | High         | Unfavorable  | 204/14,153    | 1.44% (1.25, 1.65) | 1.00 (reference)  |          |          |
|                                                                                                     |              | Intermediate | 143/12,882    | 1.11% (0.94, 1.31) | 0.90 (0.72, 1.12) | 0.339    |          |
|                                                                                                     |              | Favorable    | 46/4,610      | 1.00% (0.73, 1.33) | 0.88 (0.63, 1.23) | 0.458    | 0.328    |
|                                                                                                     | Low          | Unfavorable  | 33/6,156      | 0.54% (0.37, 0.75) | 1.00 (reference)  |          |          |
|                                                                                                     |              | Intermediate | 47/13,433     | 0.35% (0.26, 0.47) | 0.76 (0.48, 1.2)  | 0.235    |          |
|                                                                                                     |              | Favorable    | 22/10,350     | 0.21% (0.13, 0.32) | 0.54 (0.31, 0.97) | 0.038    | 0.037    |
|                                                                                                     | Intermediate | Unfavorable  | 567/50,412    | 1.12% (1.03, 1.22) | 1.00 (reference)  |          |          |
|                                                                                                     |              | Intermediate | 808/107,751   | 0.75% (0.70, 0.80) | 0.77 (0.69, 0.86) | 4.61E-06 |          |
|                                                                                                     |              | Favorable    | 422/79,576    | 0.53% (0.48, 0.58) | 0.63 (0.55, 0.72) | 2.41E-11 | 1.72E-11 |
|                                                                                                     | High         | Unfavorable  | 113/6,463     | 1.75% (1.44, 2.10) | 1.00 (reference)  |          |          |
|                                                                                                     |              | Intermediate | 180/13,412    | 1.34% (1.15, 1.55) | 0.86 (0.68, 1.1)  | 0.232    |          |
|                                                                                                     |              | Favorable    | 100/9,616     | 1.04% (0.85, 1.26) | 0.76 (0.57, 1.01) | 0.061    | 0.061    |

<sup>a</sup> Derived from Cox regression model with the adjustment of sex, age, center and first 10 principal components.

Note: PRS, polygenic risk score; HR, hazard ratio; 95% CI, 95% confidence interval.

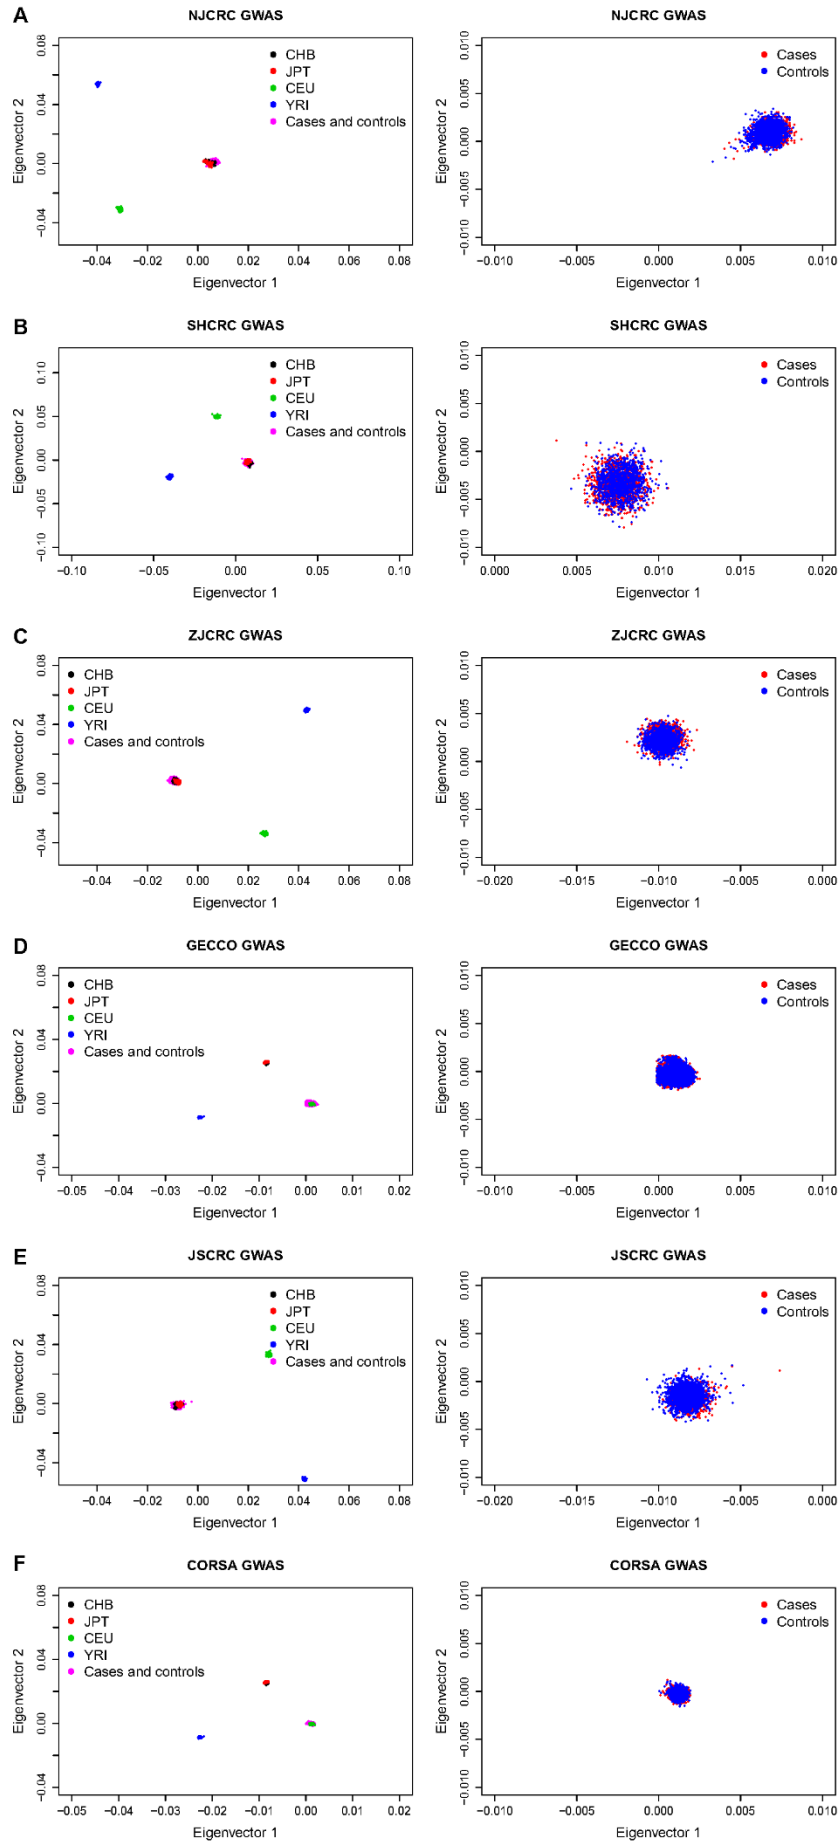

**Fig. S1.** Principal component analysis based on the colorectal cancer GWAS subjects and 1000 Genomes Project populations. (A) NJCRC GWAS of derivation stage; (B) SHCRC GWAS of derivation stage; (C) ZJCRC GWAS of derivation stage; (D) GECCO GWAS of derivation stage; (E) JSCRC GWAS of validation stage and (F) CORSA GWAS of validation stage.

Note: CHB, Han Chinese in Beijing, China; JPT, Japanese in Tokyo, Japan; CEU, Utah residents with Northern and Western European ancestry; YRI, Yoruba in Ibadan, Nigeria; GWAS, genome-wide association study; GECCO, Genetics and Epidemiology of Colorectal Cancer Consortium; CORSA, Colorectal Cancer Study of Austria.

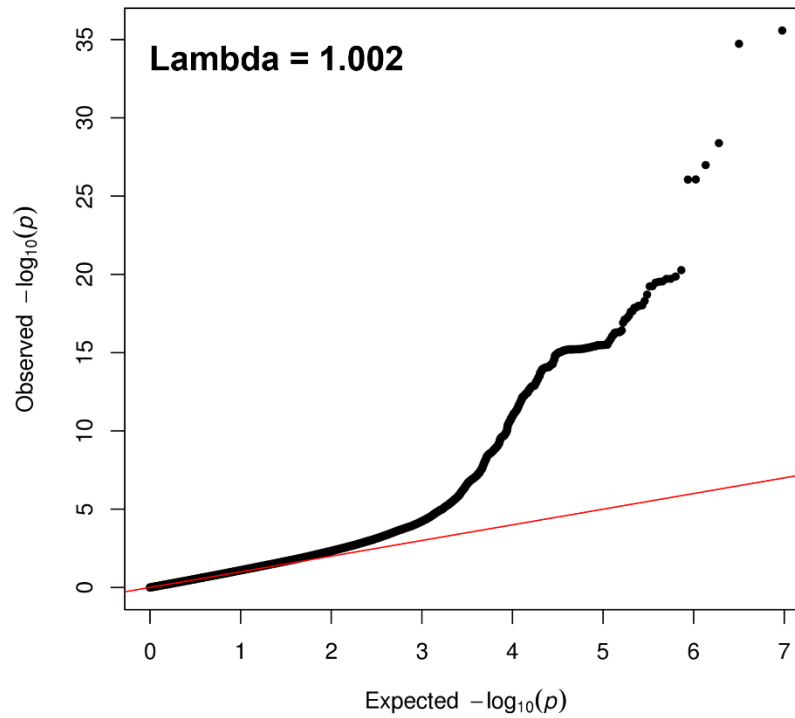

**Fig. S2.** Quantile-quantile plot and genomic inflation factor for the association with colorectal cancer risk in the meta-analysis of EAS-EUR GWASs. The X axis shows the expected distribution of the observed  $-\log_{10}(P \text{ values})$  under the null hypothesis of no association. The Y axis shows the distribution of the observed  $-\log_{10}(P \text{ values})$  of meta-analysis. Genomic inflation values (i.e., lambda) were adjusted as equal to a study of 1,000 cases and 1,000 controls.

Note: GWAS, genome-wide association study.

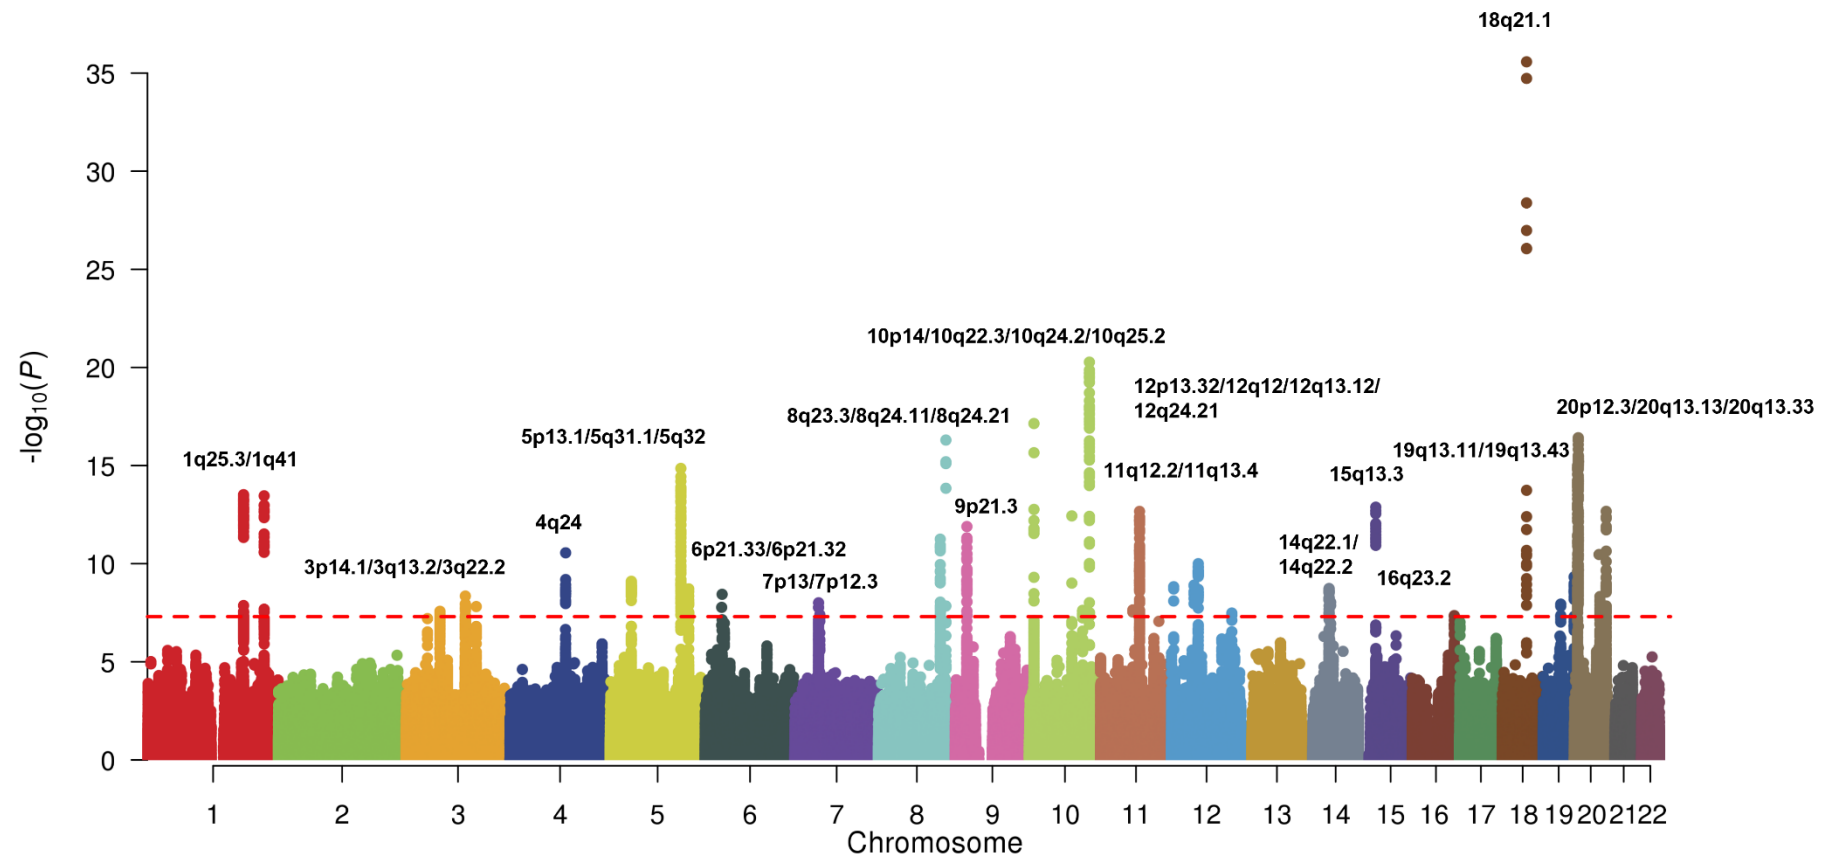

**Fig. S3.** Manhattan plot from colorectal cancer EAS-EUR GWAS meta-analysis. The associations ( $-\log_{10}(P)$ -value) values, Y-axis) are plotted against genomic position (X-axis by chromosome and the chromosomal position of NCBI build 37). The red dashed line indicates the genome-wide significance threshold ( $P = 5 \times 10^{-8}$ ). Note: GWAS, genome-wide association study.

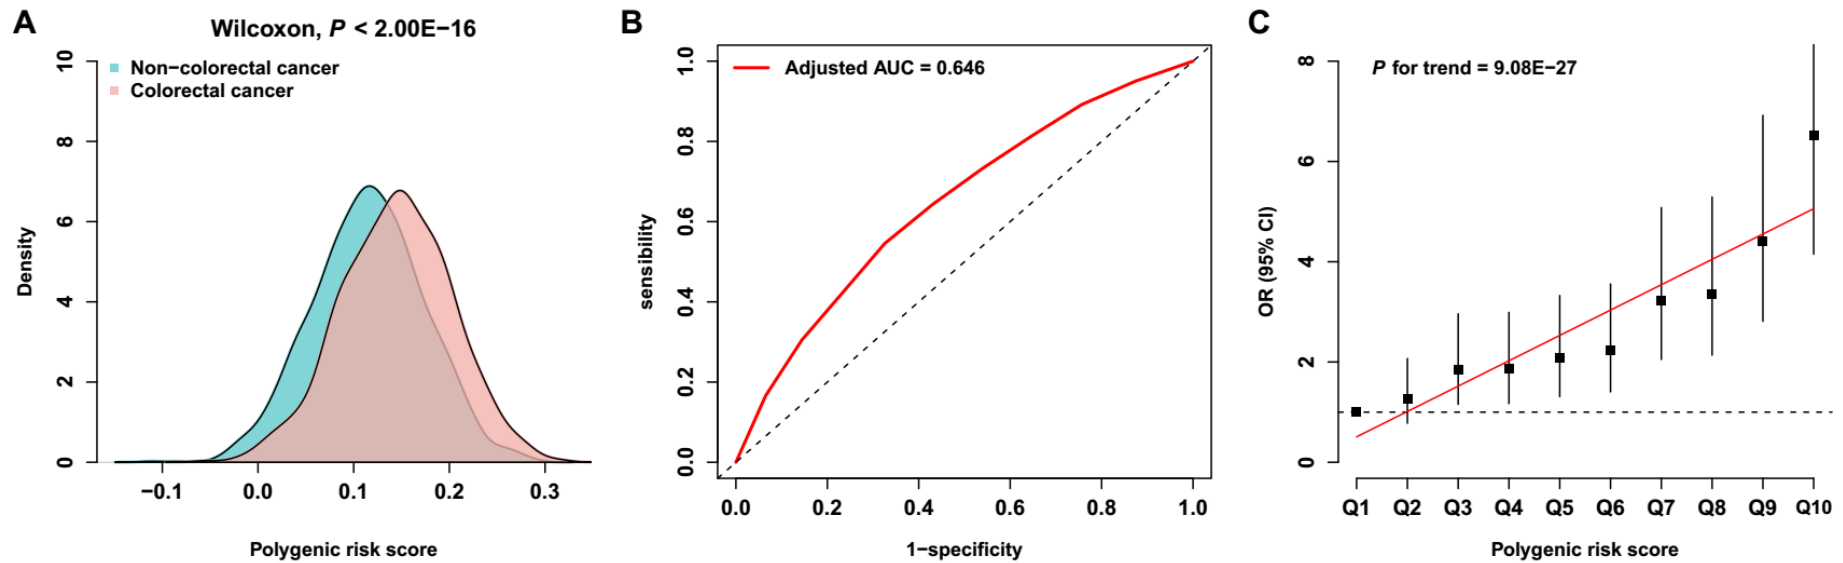

**Fig. S4.** The association of PRS<sub>CSX</sub> with incident colorectal cancer in the JSCRC GWAS dataset. (A) Density curve of PRS among colorectal cancer and non-colorectal cancer individuals. The  $P$  value was calculated by Wilcoxon rank-sum test. (B) Covariates-adjusted receiver operating characteristics curve for PRS model. (C) Participants were divided into ten equal groups according to the distribution of PRS, and the OR and 95% CI of each group were calculated compared with those at the lowest tenth group with the adjustment of sex, age and principal components.

Note: PRS, polygenic risk score; OR, odds ratio; 95% CI, 95% confidence interval.

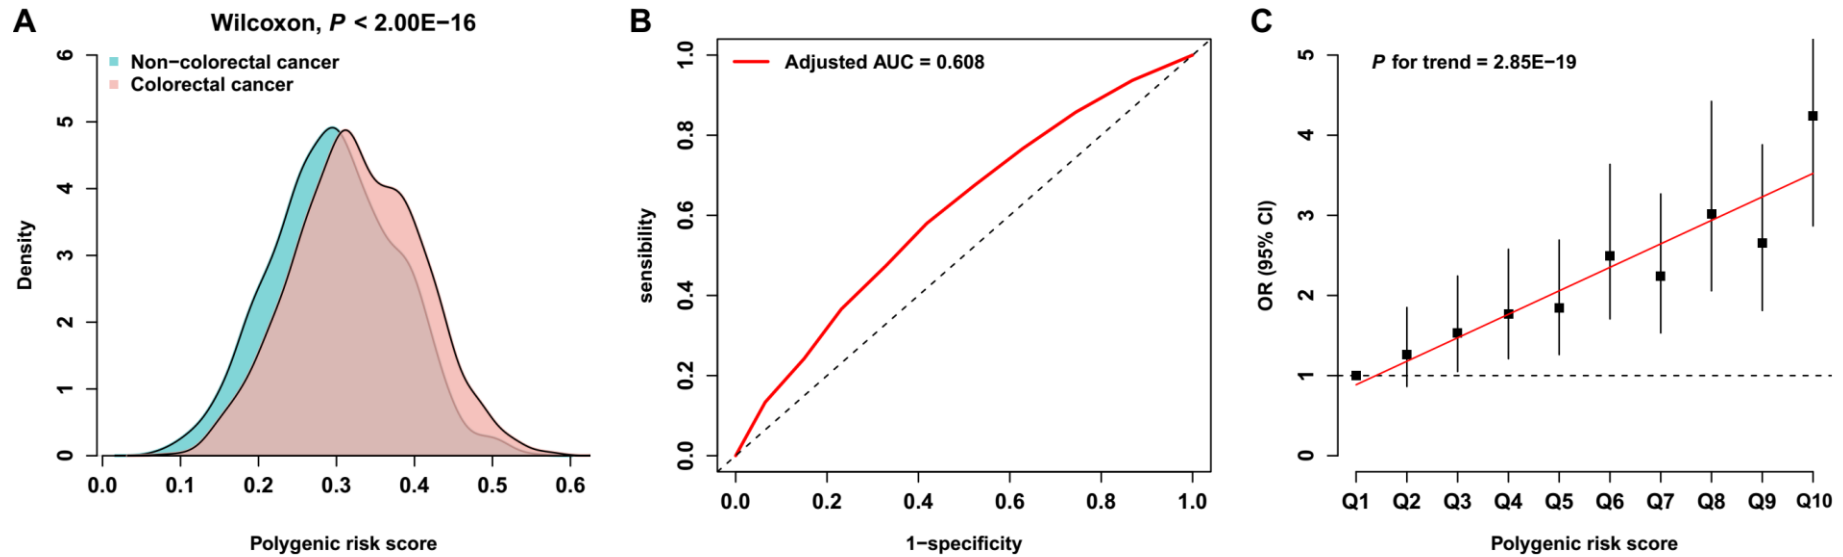

**Fig. S5.** The association of PRS<sub>CSx</sub> with incident colorectal cancer in the CORSA GWAS dataset. (A) Density curve of PRS among colorectal cancer and non-colorectal cancer individuals. The  $P$  value was calculated by Wilcoxon rank-sum test. (B) Covariates-adjusted Receiver operating characteristics curve for PRS model. (C) Participants were divided into ten equal groups according to the distribution of PRS, and the OR and 95% CI of each group were calculated compared with those at the lowest tenth group with the adjustment of sex, age and principal components.

Note: PRS, polygenic risk score; OR, odds ratio; 95% CI, 95% confidence interval; CORSA, Colorectal Cancer Study of Austria.

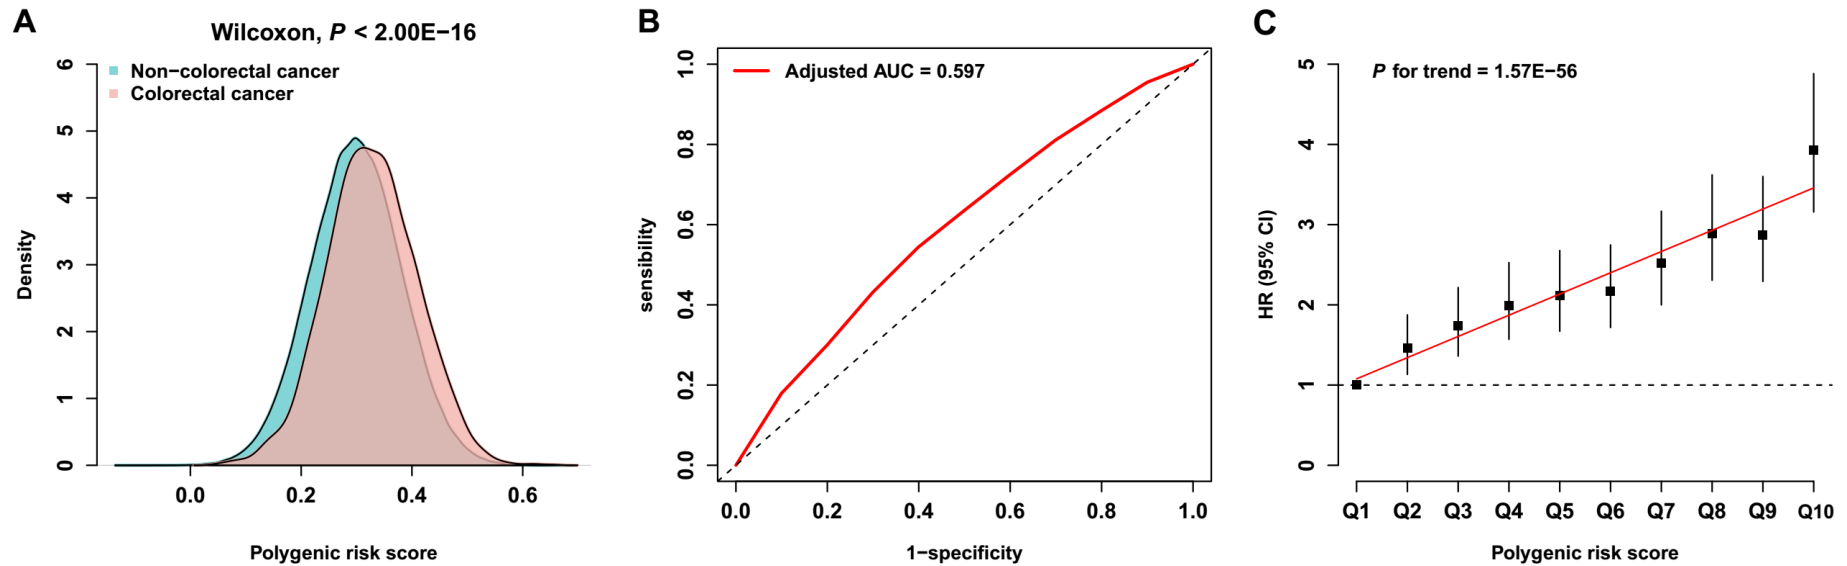

**Fig. S6.** The association of PRS with incident colorectal cancer in the UK Biobank cohort. (A) Density curve of PRS among colorectal cancer and non-colorectal cancer individuals. The  $P$  value was calculated by Wilcoxon rank-sum test. (B) Covariates-adjusted receiver operating characteristics curve for PRS model. (C) Participants were divided into ten equal groups according to the distribution of PRS, and the HR and 95% CI of each group were calculated compared with those at the lowest tenth group with the adjustment of sex, age, center, lifestyle score and first 10 principal components.

Note: PRS, polygenic risk score; HR, hazard ratio; 95% CI, 95% confidence interval.

**A**

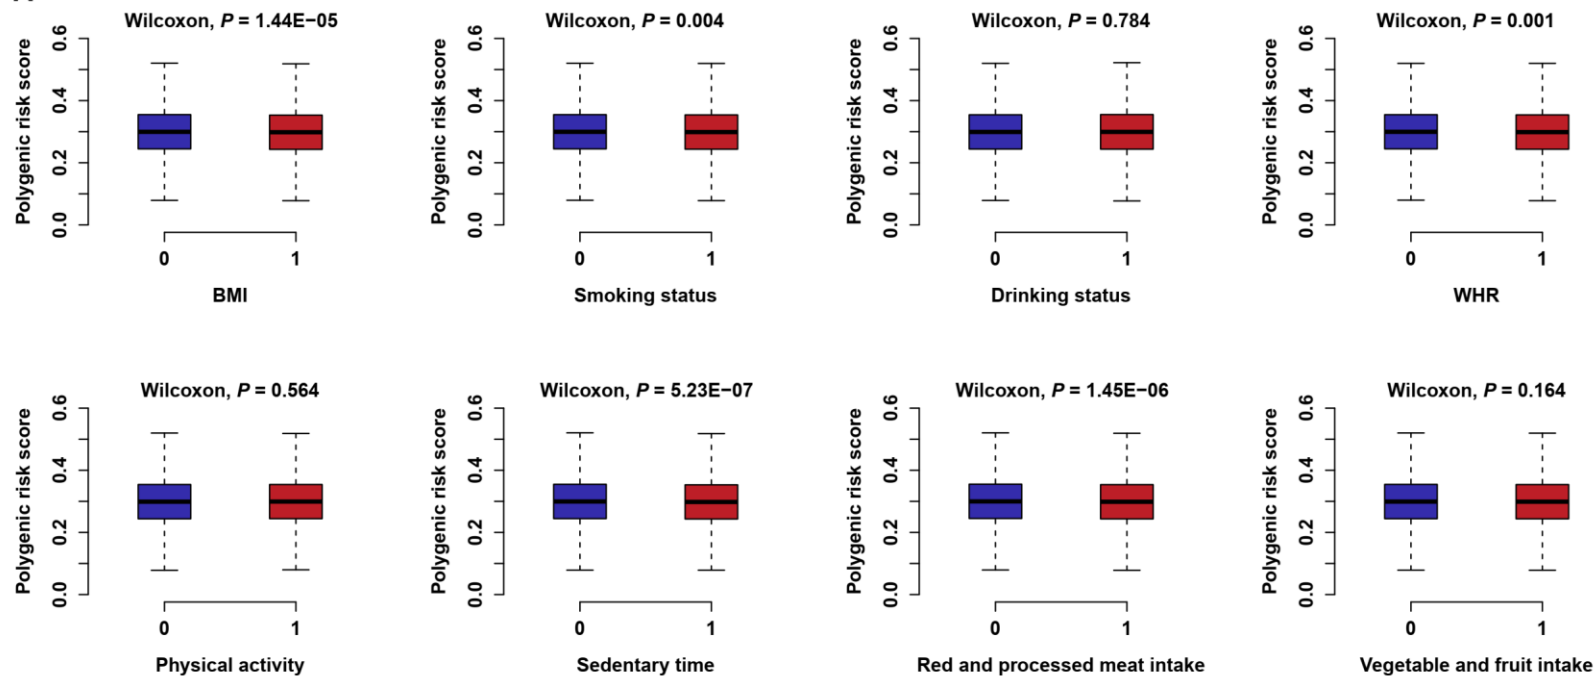

**B**

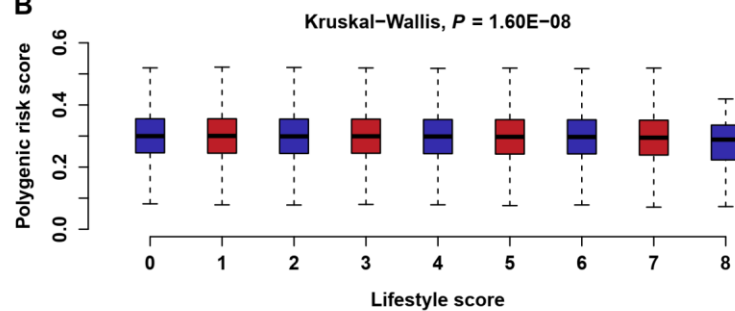

**C**

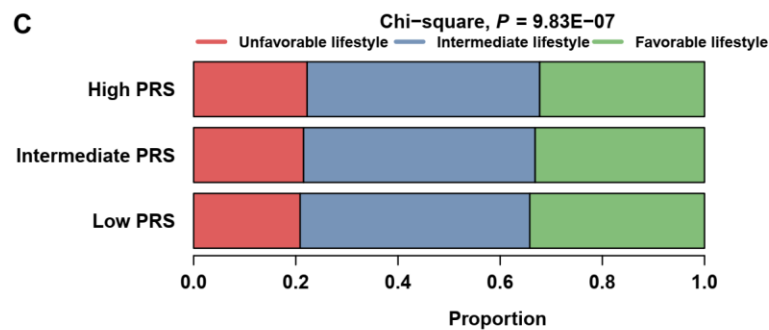

**Fig. S7.** The association of PRS with lifestyle factors in the UK Biobank cohort. (A) Each lifestyle factor (given a score of 0 or 1, with 1 representing the healthy category) and PRS; (B) Lifestyle score and PRS; (C) Different levels of lifestyle score and PRS. The *P* value was calculated by Wilcoxon rank-sum test, Kruskal-Wallis test or Chi-square test.

Note: PRS, polygenic risk score; BMI, body mass index; WHR, waist-to-hip ratio.

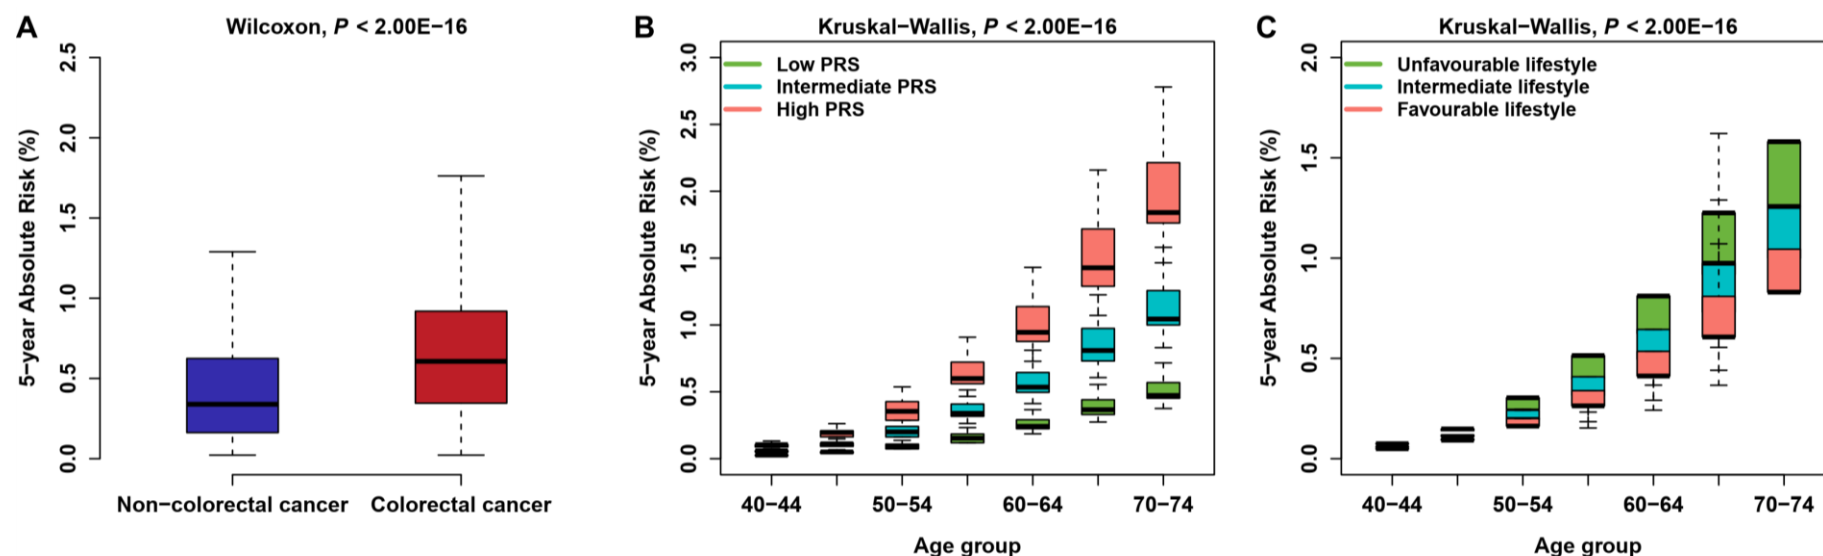

**Fig. S8.** Distribution of 5-year absolute risk of developing colorectal cancer in the UK Biobank cohort. (A) Boxplot of 5-year absolute risk among colorectal cancer and non-colorectal cancer individuals. The  $P$  value was calculated by Wilcoxon rank-sum test. (B-C) Boxplots of 5-year absolute risk stratified by different levels of (B) PRS and (C) lifestyle score among different age (i.e., age of cohort entry) groups. The  $P$  value was calculated by Kruskal-Wallis test.

Note: PRS, polygenic risk score.

## References:

1. Xin J, Du M, Gu D, Ge Y, Li S, Chu H, et al. Combinations of single nucleotide polymorphisms identified in genome-wide association studies determine risk for colorectal cancer. *Int J Cancer*. 2019; 145(10):2661-2669.
2. Xin J, Chu H, Ben S, Ge Y, Shao W, Zhao Y, et al. Evaluating the effect of multiple genetic risk score models on colorectal cancer risk prediction. *Gene*. 2018; 673:174-180.
3. Jiang K, Sun Y, Wang C, Ji J, Li Y, Ye Y, et al. Genome-wide association study identifies two new susceptibility loci for colorectal cancer at 5q23.3 and 17q12 in Han Chinese. *Oncotarget*. 2015; 6(37):40327-40336.
4. Qu X, Zhao L, Wang M, Zhang R, Cheng L, Qiu L, et al. Novel functional variants in the Notch pathway and survival of Chinese colorectal cancer. *Int J Cancer*. 2021; 149(1):84-96.
5. Ishigaki K, Akiyama M, Kanai M, Takahashi A, Kawakami E, Sugishita H, et al. Large-scale genome-wide association study in a Japanese population identifies novel susceptibility loci across different diseases. *Nat Genet*. 2020; 52(7):669-679.
6. Huyghe JR, Bien SA, Harrison TA, Kang HM, Chen S, Schmit SL, et al. Discovery of common and rare genetic risk variants for colorectal cancer. *Nat Genet*. 2019; 51(1):76-87.
7. Peters U, Jiao S, Schumacher FR, Hutter CM, Aragaki AK, Baron JA, et al. Identification of Genetic Susceptibility Loci for Colorectal Tumors in a Genome-Wide Meta-analysis. *Gastroenterology*. 2013; 144(4):799-807.
8. Chu H, Xin J, Yuan Q, Wu Y, Du M, Zheng R, et al. A prospective study of the associations among fine particulate matter, genetic variants, and the risk of colorectal cancer. *Environ Int*. 2021; 147:106309.
9. Bycroft C, Freeman C, Petkova D, Band G, Elliott LT, Sharp K, et al. The UK Biobank resource with deep phenotyping and genomic data. *Nature*. 2018; 562(7726):203-209.
10. Sudlow C, Gallacher J, Allen N, Beral V, Burton P, Danesh J, et al. UK biobank:

an open access resource for identifying the causes of a wide range of complex diseases of middle and old age. *Plos Med.* 2015; 12(3):e1001779.

11. Thomas M, Sakoda LC, Hoffmeister M, Rosenthal EA, Lee JK, van Duijnhoven F, et al. Genome-wide Modeling of Polygenic Risk Score in Colorectal Cancer Risk. *Am J Hum Genet.* 2020; 107(3):432-444.
12. Choi SW, Mak TS, O'Reilly PF. Tutorial: a guide to performing polygenic risk score analyses. *Nat Protoc.* 2020; 15(9):2759-2772.
13. Vilhjalmsdottir BJ, Yang J, Finucane HK, Gusev A, Lindstrom S, Ripke S, et al. Modeling Linkage Disequilibrium Increases Accuracy of Polygenic Risk Scores. *Am J Hum Genet.* 2015; 97(4):576-592.
14. Mak T, Porsch RM, Choi SW, Zhou X, Sham PC. Polygenic scores via penalized regression on summary statistics. *Genet Epidemiol.* 2017; 41(6):469-480.
15. Prive F, Arbel J, Vilhjalmsdottir BJ. LDpred2: better, faster, stronger. *Bioinformatics.* 2020; 36(22-23):5424-5431.
16. Ruan Y, Lin YF, Feng YA, Chen CY, Lam M, Guo Z, et al. Improving polygenic prediction in ancestrally diverse populations. *Nat Genet.* 2022; 54(5):573-580.
17. Ge T, Irvin MR, Patki A, Srinivasasainagendra V, Lin YF, Tiwari HK, et al. Development and validation of a trans-ancestry polygenic risk score for type 2 diabetes in diverse populations. *Genome Med.* 2022; 14(1):70.
